# Supplementary material for: To Vaccinate or Not to Vaccinate—This Is the Question among Swiss University Students
Source: MDPI journal article supplement (doi:10.3390/ijerph18179210), 2021-08-31
Supplement: s1 [file s1]

## Supplemental File

# To Vaccinate or Not to Vaccinate—This Is the Question among Swiss University Students

Julia Dratva <sup>1,2,\*</sup>, Aylin Wagner <sup>1,†</sup>, Annina Zysset <sup>1</sup> and Thomas Volken <sup>1</sup>

<sup>1</sup> Institute of Health Sciences, ZHAW Zurich University of Applied Sciences, Katharina-Sulzer-Platz 9, 8401 Winterthur, Switzerland; aylin.wagner@zhaw.ch (A.W.); annina.zysset@zhaw.ch (A.Z.); thomas.volken@zhaw.ch (T.V.)

<sup>2</sup> Medical Faculty, University of Basel, Klingelbergstrasse 61, 4056 Basel, Switzerland

\* Correspondence: julia.dratva@zhaw.ch

† Authors contributed in equal shares (shared first authorship).

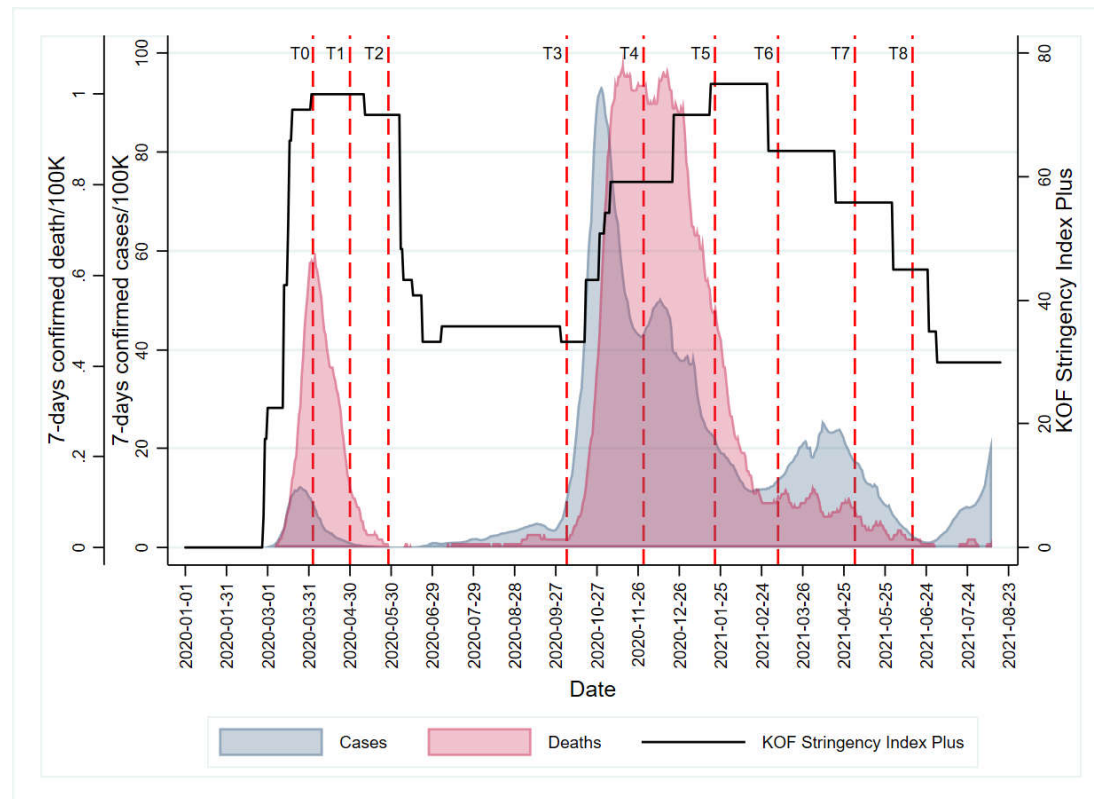

Figure S1. Epidemiological data and KOF Stringency Index over the duration of the HES-C study.

Legend:

T0 – T8 correspond to wave 1 – wave 9 of the HES-C study;

KOF Stringency Index records the stringency of COVID-19 containment measures in Switzerland [1].

**Table S1.** COVID-19 vaccination intention – Unadjusted ordinal logistic regression model

|                        | Coefficient           | 95% CI       |
|------------------------|-----------------------|--------------|
| /Cut1                  | 4.13                  | 2.89 - 5.36  |
| /Cut2                  | 6.44                  | 5.17 - 7.71  |
| /Cut3                  | 7.96                  | 6.66 - 9.26  |
| /Cut4                  | 9.23                  | 7.91 - 10.55 |
| /Cut5                  | 11.12                 | 9.77 - 12.48 |
| Number of observations | 1297                  |              |
| Pseudo R-squared       | 0                     |              |
| Log likelihood         | -2234                 |              |
| Outcome                | Predicted probability | 95% CI       |
| 1                      | 0.08                  | 0.06 - 0.09  |
| 2                      | 0.14                  | 0.12 - 0.16  |
| 3                      | 0.14                  | 0.13 - 0.16  |
| 4                      | 0.15                  | 0.13 - 0.17  |
| 5                      | 0.24                  | 0.22 - 0.26  |
| 6                      | 0.25                  | 0.23 - 0.27  |

95% CI = 95% confidence interval

#### Reference

1. Pleninger, R.; Streicher, S.; Sturm, J.-E. Do COVID-19 Containment Measures Work? Evidence from Switzerland. **2021**, 53 p., doi:10.3929/ETHZ-B-000493408.
